# Supplementary material
Source: PubMed Central journal article supplement (PMC7232635)
Supplement: Supp_Fig-S1.pdf [file Supp_Fig-S1.pdf]

# Supplementary Data

## Best Case/Worst Case Skills Checklist & Observation Form

|                                                                                                                                                                                                                                                                                                                                                                                                                                                                                                                                                                                                                                                                                                                                                                                                                                                                                                                                                                                                                                                                                                                                                                              |                                                                               |                                                                              |                                                                                                            |                                                                               |                                                                              |                                                                                                                                                                                                                                                                                                                                                                                                                                                                                                                                                                                                                                                                                                                                                                                     |                        |                           |                                                                                                                                                                                                                                                                                                                                                                                                                                                                                                                                                                                                                                                                                                                                                                                                                                                                                                                                                                                                                                                                                                                                                                                     |                                                                               |                                                                              |                                                                                                            |                                                                               |                                                                              |
|------------------------------------------------------------------------------------------------------------------------------------------------------------------------------------------------------------------------------------------------------------------------------------------------------------------------------------------------------------------------------------------------------------------------------------------------------------------------------------------------------------------------------------------------------------------------------------------------------------------------------------------------------------------------------------------------------------------------------------------------------------------------------------------------------------------------------------------------------------------------------------------------------------------------------------------------------------------------------------------------------------------------------------------------------------------------------------------------------------------------------------------------------------------------------|-------------------------------------------------------------------------------|------------------------------------------------------------------------------|------------------------------------------------------------------------------------------------------------|-------------------------------------------------------------------------------|------------------------------------------------------------------------------|-------------------------------------------------------------------------------------------------------------------------------------------------------------------------------------------------------------------------------------------------------------------------------------------------------------------------------------------------------------------------------------------------------------------------------------------------------------------------------------------------------------------------------------------------------------------------------------------------------------------------------------------------------------------------------------------------------------------------------------------------------------------------------------|------------------------|---------------------------|-------------------------------------------------------------------------------------------------------------------------------------------------------------------------------------------------------------------------------------------------------------------------------------------------------------------------------------------------------------------------------------------------------------------------------------------------------------------------------------------------------------------------------------------------------------------------------------------------------------------------------------------------------------------------------------------------------------------------------------------------------------------------------------------------------------------------------------------------------------------------------------------------------------------------------------------------------------------------------------------------------------------------------------------------------------------------------------------------------------------------------------------------------------------------------------|-------------------------------------------------------------------------------|------------------------------------------------------------------------------|------------------------------------------------------------------------------------------------------------|-------------------------------------------------------------------------------|------------------------------------------------------------------------------|
| <p><b>Described experience of dialysis</b><br/>No <input type="checkbox"/> Yes <input type="checkbox"/></p> <p>Described a <b>BEST CASE</b> outcome</p> <table border="1" style="width: 100%; border-collapse: collapse;"> <tr> <td style="text-align: center;"><b>Short-term</b><br/>No <input type="checkbox"/> Yes <input type="checkbox"/></td> </tr> <tr> <td style="text-align: center;"><b>long-term</b><br/>No <input type="checkbox"/> Yes <input type="checkbox"/></td> </tr> </table> <p>Described a <b>MOST LIKELY</b> outcome</p> <table border="1" style="width: 100%; border-collapse: collapse;"> <tr> <td style="text-align: center;"><b>Incorporated chronic medical conditions</b><br/>No <input type="checkbox"/> Yes <input type="checkbox"/></td> </tr> </table> <p>Described a <b>WORST CASE</b> outcome</p> <table border="1" style="width: 100%; border-collapse: collapse;"> <tr> <td style="text-align: center;"><b>Short-term</b><br/>No <input type="checkbox"/> Yes <input type="checkbox"/></td> </tr> <tr> <td style="text-align: center;"><b>Long-term</b><br/>No <input type="checkbox"/> Yes <input type="checkbox"/></td> </tr> </table> | <b>Short-term</b><br>No <input type="checkbox"/> Yes <input type="checkbox"/> | <b>long-term</b><br>No <input type="checkbox"/> Yes <input type="checkbox"/> | <b>Incorporated chronic medical conditions</b><br>No <input type="checkbox"/> Yes <input type="checkbox"/> | <b>Short-term</b><br>No <input type="checkbox"/> Yes <input type="checkbox"/> | <b>Long-term</b><br>No <input type="checkbox"/> Yes <input type="checkbox"/> | <p><b>Broke bad news</b><br/>No <input type="checkbox"/> Yes <input type="checkbox"/></p> <div style="border: 2px solid black; padding: 10px; margin: 10px auto; width: 80%;"> <table border="0" style="width: 100%; border-collapse: collapse;"> <tr> <td style="width: 50%; text-align: center; vertical-align: top;"> <p><b>Dialysis</b></p> </td> <td style="width: 50%; text-align: center; vertical-align: top;"> <p><b>No Dialysis</b></p> </td> </tr> </table> </div> <p><b>Used questions or phrases to encourage deliberation</b><br/>No <input type="checkbox"/> Yes <input type="checkbox"/></p> <p><b>Made a recommendation linked to patient preferences (includes support from palliative care)</b><br/>No <input type="checkbox"/> Yes <input type="checkbox"/></p> | <p><b>Dialysis</b></p> | <p><b>No Dialysis</b></p> | <p><b>Described experience of supportive care</b><br/>No <input type="checkbox"/> Yes <input type="checkbox"/></p> <p>Described a <b>BEST CASE</b> outcome</p> <table border="1" style="width: 100%; border-collapse: collapse;"> <tr> <td style="text-align: center;"><b>Short-term</b><br/>No <input type="checkbox"/> Yes <input type="checkbox"/></td> </tr> <tr> <td style="text-align: center;"><b>Long-term</b><br/>No <input type="checkbox"/> Yes <input type="checkbox"/></td> </tr> </table> <p>Described a <b>MOST LIKELY</b> outcome</p> <table border="1" style="width: 100%; border-collapse: collapse;"> <tr> <td style="text-align: center;"><b>Incorporated chronic medical conditions</b><br/>No <input type="checkbox"/> Yes <input type="checkbox"/></td> </tr> </table> <p>Described a <b>WORST CASE</b> outcome</p> <table border="1" style="width: 100%; border-collapse: collapse;"> <tr> <td style="text-align: center;"><b>Short-term</b><br/>No <input type="checkbox"/> Yes <input type="checkbox"/></td> </tr> <tr> <td style="text-align: center;"><b>Long-term</b><br/>No <input type="checkbox"/> Yes <input type="checkbox"/></td> </tr> </table> | <b>Short-term</b><br>No <input type="checkbox"/> Yes <input type="checkbox"/> | <b>Long-term</b><br>No <input type="checkbox"/> Yes <input type="checkbox"/> | <b>Incorporated chronic medical conditions</b><br>No <input type="checkbox"/> Yes <input type="checkbox"/> | <b>Short-term</b><br>No <input type="checkbox"/> Yes <input type="checkbox"/> | <b>Long-term</b><br>No <input type="checkbox"/> Yes <input type="checkbox"/> |
| <b>Short-term</b><br>No <input type="checkbox"/> Yes <input type="checkbox"/>                                                                                                                                                                                                                                                                                                                                                                                                                                                                                                                                                                                                                                                                                                                                                                                                                                                                                                                                                                                                                                                                                                |                                                                               |                                                                              |                                                                                                            |                                                                               |                                                                              |                                                                                                                                                                                                                                                                                                                                                                                                                                                                                                                                                                                                                                                                                                                                                                                     |                        |                           |                                                                                                                                                                                                                                                                                                                                                                                                                                                                                                                                                                                                                                                                                                                                                                                                                                                                                                                                                                                                                                                                                                                                                                                     |                                                                               |                                                                              |                                                                                                            |                                                                               |                                                                              |
| <b>long-term</b><br>No <input type="checkbox"/> Yes <input type="checkbox"/>                                                                                                                                                                                                                                                                                                                                                                                                                                                                                                                                                                                                                                                                                                                                                                                                                                                                                                                                                                                                                                                                                                 |                                                                               |                                                                              |                                                                                                            |                                                                               |                                                                              |                                                                                                                                                                                                                                                                                                                                                                                                                                                                                                                                                                                                                                                                                                                                                                                     |                        |                           |                                                                                                                                                                                                                                                                                                                                                                                                                                                                                                                                                                                                                                                                                                                                                                                                                                                                                                                                                                                                                                                                                                                                                                                     |                                                                               |                                                                              |                                                                                                            |                                                                               |                                                                              |
| <b>Incorporated chronic medical conditions</b><br>No <input type="checkbox"/> Yes <input type="checkbox"/>                                                                                                                                                                                                                                                                                                                                                                                                                                                                                                                                                                                                                                                                                                                                                                                                                                                                                                                                                                                                                                                                   |                                                                               |                                                                              |                                                                                                            |                                                                               |                                                                              |                                                                                                                                                                                                                                                                                                                                                                                                                                                                                                                                                                                                                                                                                                                                                                                     |                        |                           |                                                                                                                                                                                                                                                                                                                                                                                                                                                                                                                                                                                                                                                                                                                                                                                                                                                                                                                                                                                                                                                                                                                                                                                     |                                                                               |                                                                              |                                                                                                            |                                                                               |                                                                              |
| <b>Short-term</b><br>No <input type="checkbox"/> Yes <input type="checkbox"/>                                                                                                                                                                                                                                                                                                                                                                                                                                                                                                                                                                                                                                                                                                                                                                                                                                                                                                                                                                                                                                                                                                |                                                                               |                                                                              |                                                                                                            |                                                                               |                                                                              |                                                                                                                                                                                                                                                                                                                                                                                                                                                                                                                                                                                                                                                                                                                                                                                     |                        |                           |                                                                                                                                                                                                                                                                                                                                                                                                                                                                                                                                                                                                                                                                                                                                                                                                                                                                                                                                                                                                                                                                                                                                                                                     |                                                                               |                                                                              |                                                                                                            |                                                                               |                                                                              |
| <b>Long-term</b><br>No <input type="checkbox"/> Yes <input type="checkbox"/>                                                                                                                                                                                                                                                                                                                                                                                                                                                                                                                                                                                                                                                                                                                                                                                                                                                                                                                                                                                                                                                                                                 |                                                                               |                                                                              |                                                                                                            |                                                                               |                                                                              |                                                                                                                                                                                                                                                                                                                                                                                                                                                                                                                                                                                                                                                                                                                                                                                     |                        |                           |                                                                                                                                                                                                                                                                                                                                                                                                                                                                                                                                                                                                                                                                                                                                                                                                                                                                                                                                                                                                                                                                                                                                                                                     |                                                                               |                                                                              |                                                                                                            |                                                                               |                                                                              |
| <p><b>Dialysis</b></p>                                                                                                                                                                                                                                                                                                                                                                                                                                                                                                                                                                                                                                                                                                                                                                                                                                                                                                                                                                                                                                                                                                                                                       | <p><b>No Dialysis</b></p>                                                     |                                                                              |                                                                                                            |                                                                               |                                                                              |                                                                                                                                                                                                                                                                                                                                                                                                                                                                                                                                                                                                                                                                                                                                                                                     |                        |                           |                                                                                                                                                                                                                                                                                                                                                                                                                                                                                                                                                                                                                                                                                                                                                                                                                                                                                                                                                                                                                                                                                                                                                                                     |                                                                               |                                                                              |                                                                                                            |                                                                               |                                                                              |
| <b>Short-term</b><br>No <input type="checkbox"/> Yes <input type="checkbox"/>                                                                                                                                                                                                                                                                                                                                                                                                                                                                                                                                                                                                                                                                                                                                                                                                                                                                                                                                                                                                                                                                                                |                                                                               |                                                                              |                                                                                                            |                                                                               |                                                                              |                                                                                                                                                                                                                                                                                                                                                                                                                                                                                                                                                                                                                                                                                                                                                                                     |                        |                           |                                                                                                                                                                                                                                                                                                                                                                                                                                                                                                                                                                                                                                                                                                                                                                                                                                                                                                                                                                                                                                                                                                                                                                                     |                                                                               |                                                                              |                                                                                                            |                                                                               |                                                                              |
| <b>Long-term</b><br>No <input type="checkbox"/> Yes <input type="checkbox"/>                                                                                                                                                                                                                                                                                                                                                                                                                                                                                                                                                                                                                                                                                                                                                                                                                                                                                                                                                                                                                                                                                                 |                                                                               |                                                                              |                                                                                                            |                                                                               |                                                                              |                                                                                                                                                                                                                                                                                                                                                                                                                                                                                                                                                                                                                                                                                                                                                                                     |                        |                           |                                                                                                                                                                                                                                                                                                                                                                                                                                                                                                                                                                                                                                                                                                                                                                                                                                                                                                                                                                                                                                                                                                                                                                                     |                                                                               |                                                                              |                                                                                                            |                                                                               |                                                                              |
| <b>Incorporated chronic medical conditions</b><br>No <input type="checkbox"/> Yes <input type="checkbox"/>                                                                                                                                                                                                                                                                                                                                                                                                                                                                                                                                                                                                                                                                                                                                                                                                                                                                                                                                                                                                                                                                   |                                                                               |                                                                              |                                                                                                            |                                                                               |                                                                              |                                                                                                                                                                                                                                                                                                                                                                                                                                                                                                                                                                                                                                                                                                                                                                                     |                        |                           |                                                                                                                                                                                                                                                                                                                                                                                                                                                                                                                                                                                                                                                                                                                                                                                                                                                                                                                                                                                                                                                                                                                                                                                     |                                                                               |                                                                              |                                                                                                            |                                                                               |                                                                              |
| <b>Short-term</b><br>No <input type="checkbox"/> Yes <input type="checkbox"/>                                                                                                                                                                                                                                                                                                                                                                                                                                                                                                                                                                                                                                                                                                                                                                                                                                                                                                                                                                                                                                                                                                |                                                                               |                                                                              |                                                                                                            |                                                                               |                                                                              |                                                                                                                                                                                                                                                                                                                                                                                                                                                                                                                                                                                                                                                                                                                                                                                     |                        |                           |                                                                                                                                                                                                                                                                                                                                                                                                                                                                                                                                                                                                                                                                                                                                                                                                                                                                                                                                                                                                                                                                                                                                                                                     |                                                                               |                                                                              |                                                                                                            |                                                                               |                                                                              |
| <b>Long-term</b><br>No <input type="checkbox"/> Yes <input type="checkbox"/>                                                                                                                                                                                                                                                                                                                                                                                                                                                                                                                                                                                                                                                                                                                                                                                                                                                                                                                                                                                                                                                                                                 |                                                                               |                                                                              |                                                                                                            |                                                                               |                                                                              |                                                                                                                                                                                                                                                                                                                                                                                                                                                                                                                                                                                                                                                                                                                                                                                     |                        |                           |                                                                                                                                                                                                                                                                                                                                                                                                                                                                                                                                                                                                                                                                                                                                                                                                                                                                                                                                                                                                                                                                                                                                                                                     |                                                                               |                                                                              |                                                                                                            |                                                                               |                                                                              |

|                                                                                                                                                                        |                                                          |
|------------------------------------------------------------------------------------------------------------------------------------------------------------------------|----------------------------------------------------------|
| Graphic aid shows dialysis and supportive care, clearly named, and for each treatment there is a vertical line with a box, star, and oval/mark to indicate most likely | No <input type="checkbox"/> Yes <input type="checkbox"/> |
| Written graphic aid includes written Best Case, Worst Case and Most Likely outcomes for each treatment offered                                                         | No <input type="checkbox"/> Yes <input type="checkbox"/> |
| Wrote patient-friendly terminology on the graphic aid                                                                                                                  | No <input type="checkbox"/> Yes <input type="checkbox"/> |
| Wrote "what is important to you now?" or equivalent phrase on the graphic aid                                                                                          | No <input type="checkbox"/> Yes <input type="checkbox"/> |

NEPHROLOGIST: \_\_\_\_\_

TRAINER: \_\_\_\_\_

CASE #: \_\_\_\_\_

TOTAL SCORED POINTS: \_\_\_\_\_/19

ADDITIONAL COMMENTS:

SUPPLEMENTARY FIG. S1. BC/WC training checklist. BC/WC, best case/worst case.
