# Supplementary material
Source: PubMed Central journal article supplement (PMC7232635)
Supplement: Supp_Fig-S2-S3.pdf [file Supp_Fig-S2-S3.pdf]

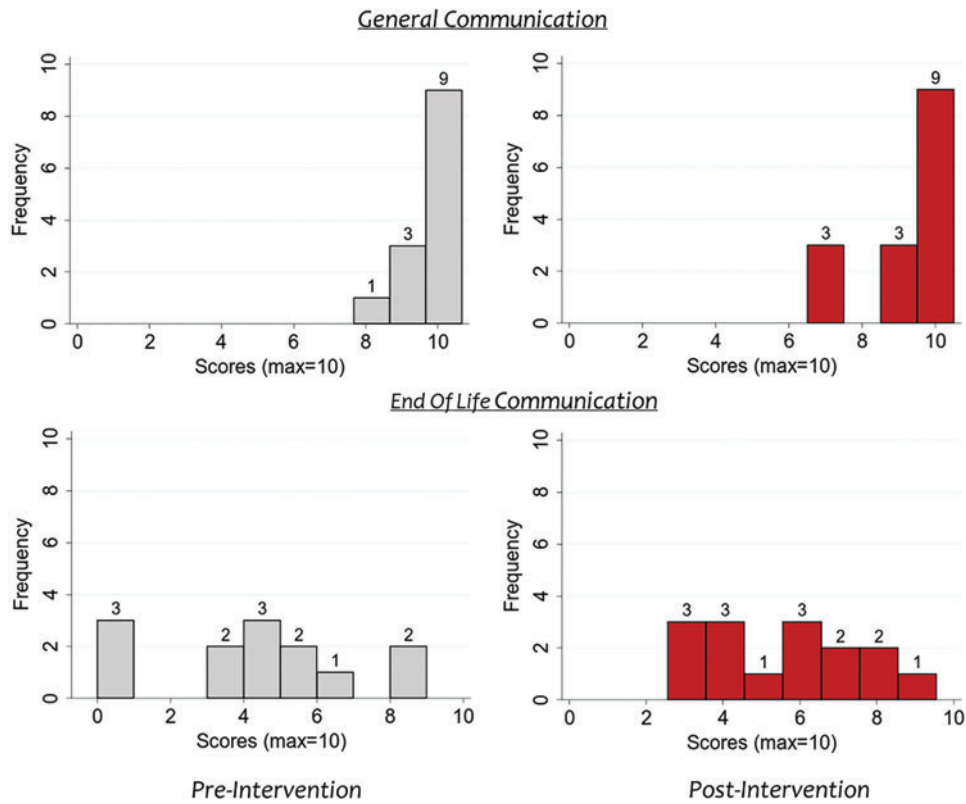

SUPPLEMENTARY FIG. S2. Quality of communication survey scores before and after BC/WC training.

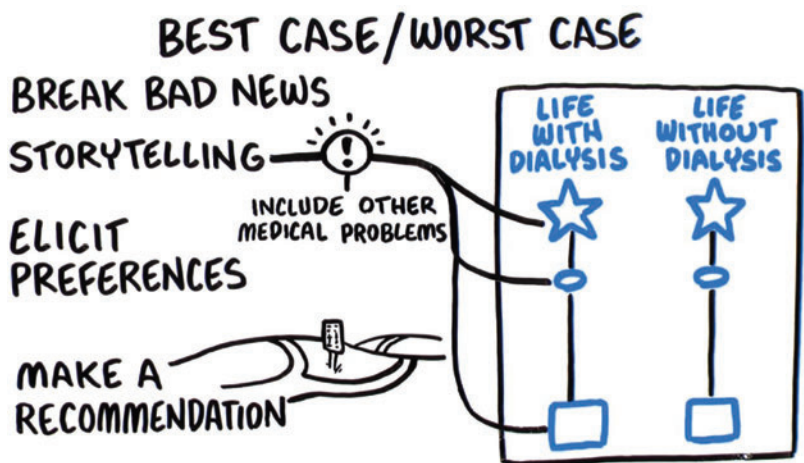

SUPPLEMENTARY FIG. S3. BC/WC nephrology whiteboard video (youtube.com/watch?v=OXFXV7K03A).
